# Supplementary material for: Genetic Variation inCYP17A1Is Associated with Arterial Stiffness in Diabetic Subjects
Source: Hindawi journal article supplement (doi:10.1155/2012/827172), 2012-01-01
Supplement: f1 [file 827172.f1.pdf]

Supplementary Table S1: List of single nucleotide polymorphisms (SNP) investigated in the present study.

| SNP ID    | Nearby gene      | SNP ID     | Nearby gene           | SNP ID     | Nearby gene   |
|-----------|------------------|------------|-----------------------|------------|---------------|
| rs699     | <i>AGT</i>       | rs2303934  | <i>SLC4A2</i>         | rs11195417 | <i>ADRA2A</i> |
| rs4532    | <i>DRD1</i>      | rs2384550  | <i>TBX3</i>           | rs11195419 | <i>ADRA2A</i> |
| rs4961    | <i>ADD1</i>      | rs2398162  | <i>LOC100132798</i>   | rs12035521 | <i>ATP2B4</i> |
| rs5186    | <i>AGTR1</i>     | rs2681472  | <i>ATP2B1</i>         | rs12945290 | <i>ARSG</i>   |
| rs5326    | <i>DRD1</i>      | rs2681492  | <i>ATP2B1</i>         | rs12946454 | <i>ACBD4</i>  |
| rs5443    | <i>GNB3</i>      | rs2820037  | <i>CHRM3</i>          | rs16948048 | <i>ZNF652</i> |
| rs265981  | <i>DRD1</i>      | rs2960306  | <i>GRK4</i>           | rs16998073 | <i>FGF5</i>   |
| rs381815  | <i>PLEKHA7</i>   | rs3754777  | <i>STK39</i>          | rs17097182 | <i>LEPR</i>   |
| rs394112  | <i>SLC8A1</i>    | rs4149601  | <i>NEDD4L</i>         | rs17249754 | <i>ATP2B1</i> |
| rs405884  | <i>SLC8A1</i>    | rs6495122  | <i>CPLX3</i>          | rs17367504 | <i>MTHFR</i>  |
| rs406222  | <i>SLC8A1</i>    | rs6594013  | <i>ATP2B4</i>         |            |               |
| rs415695  | <i>SLC8A1</i>    | rs6749447  | <i>STK39</i>          |            |               |
| rs995322  | <i>CSMD1</i>     | rs6997709  | <i>KCNK9, COL22A1</i> |            |               |
| rs1004467 | <i>CYP17A1</i>   | rs7926335  | <i>PLEKHA7</i>        |            |               |
| rs1024323 | <i>GRK4</i>      | rs7961152  | <i>BCAT1</i>          |            |               |
| rs1105297 | <i>SLC2A1</i>    | rs9815354  | <i>ULK4</i>           |            |               |
| rs1378942 | <i>CSK</i>       | rs10889553 | <i>LEPR</i>           |            |               |
| rs1530440 | <i>C10orf107</i> | rs10954174 | <i>LEP</i>            |            |               |
| rs1799998 | <i>CYP11B2</i>   | rs11014166 | <i>CACNB2</i>         |            |               |
| rs1801058 | <i>GRK4</i>      | rs11110912 | <i>MYBPC1</i>         |            |               |
| rs1937506 | <i>PCDH9</i>     | rs11191548 | <i>NT5C2</i>          |            |               |
